# Supplementary material
Source: ML conference proceedings conference paper supplement (https://openreview.net/forum?id=rGyi8NNqB0)

win95pts

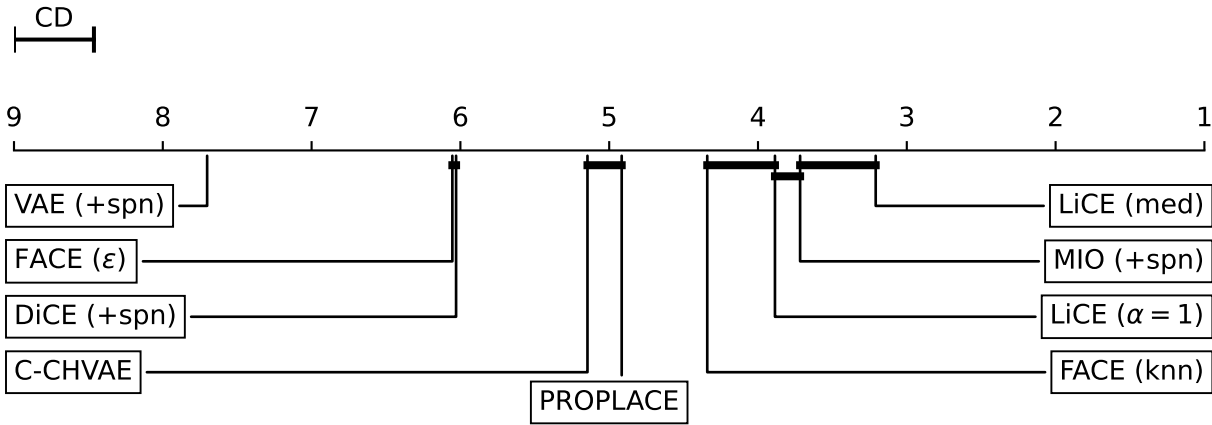

Supplement: supplementary_material [file attachment]

asia

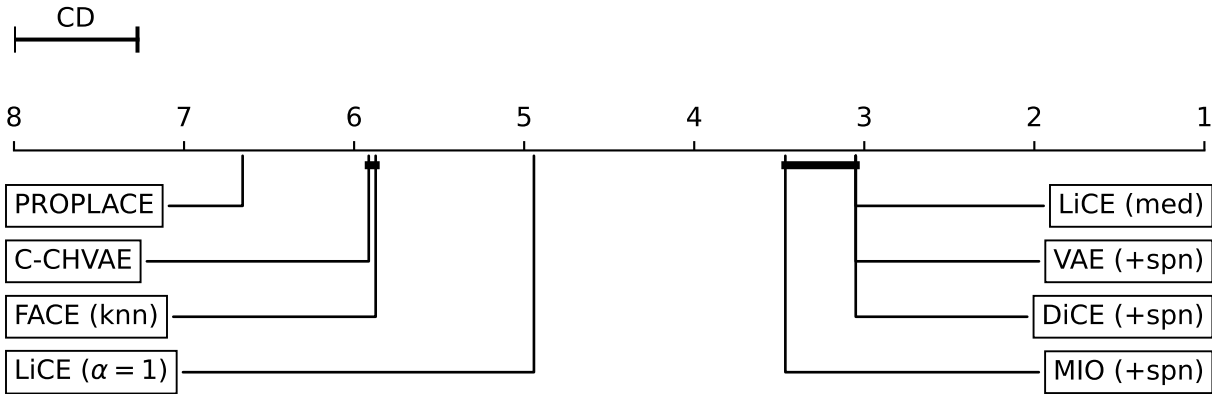

Supplement: supplementary_material [file attachment]

win95pts

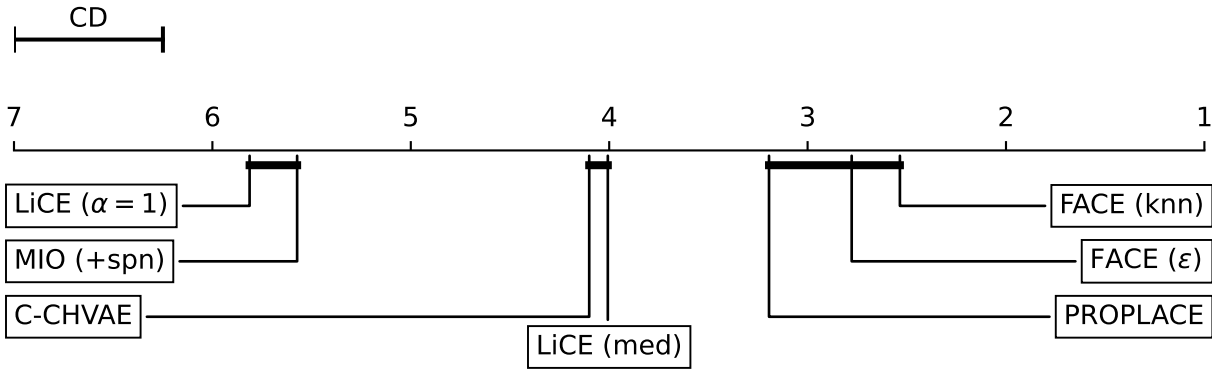

Supplement: supplementary_material [file attachment]

# asia

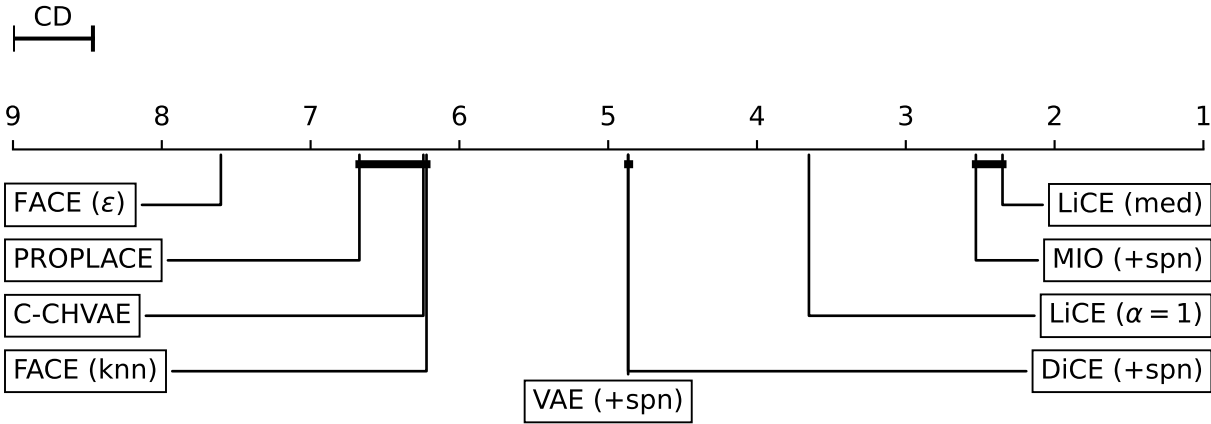

Supplement: supplementary_material [file attachment]

alarm

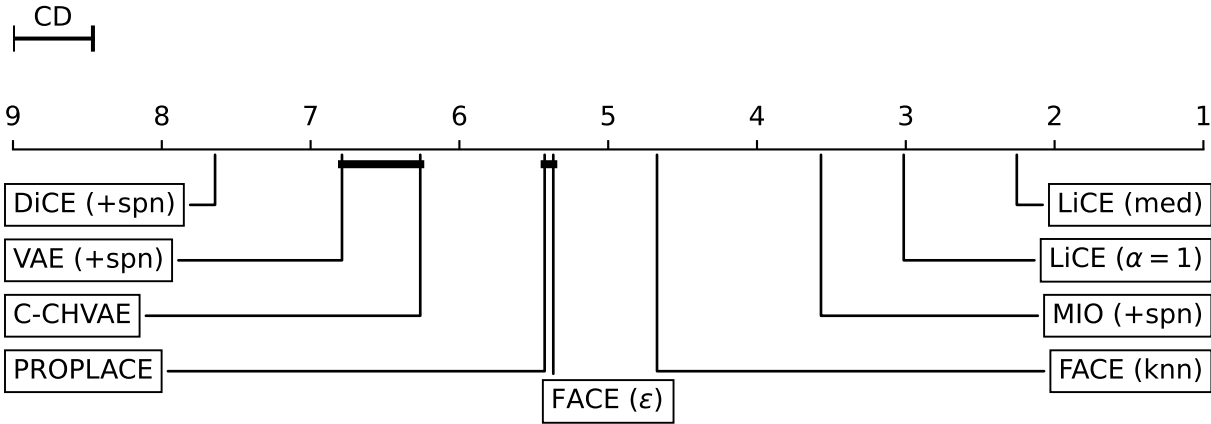

Supplement: supplementary_material [file attachment]

sprinkler

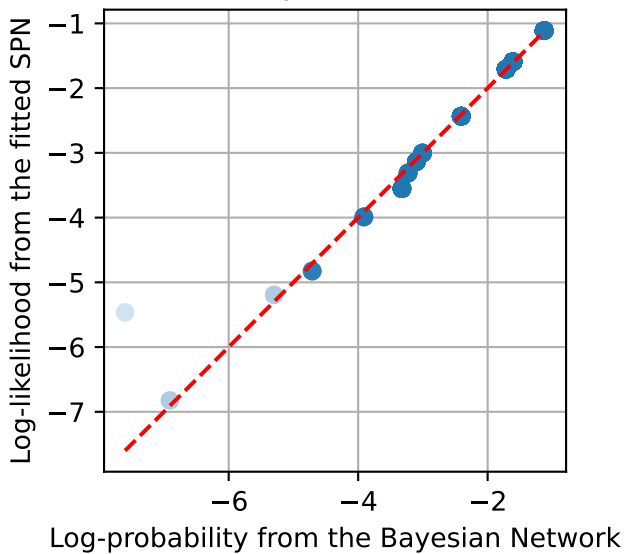

asia

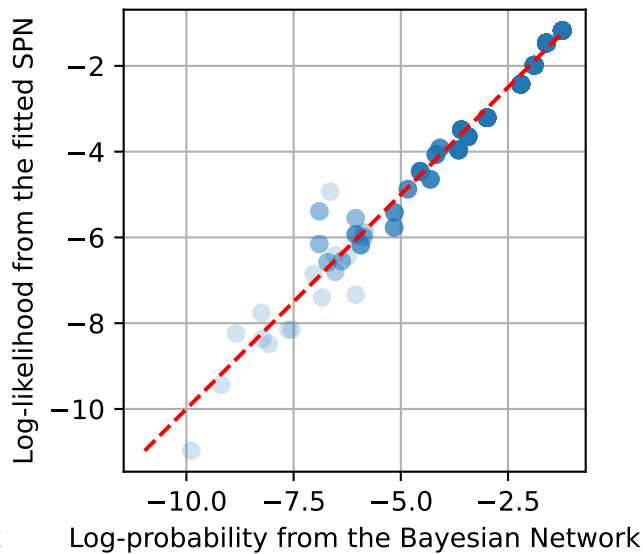

sachs

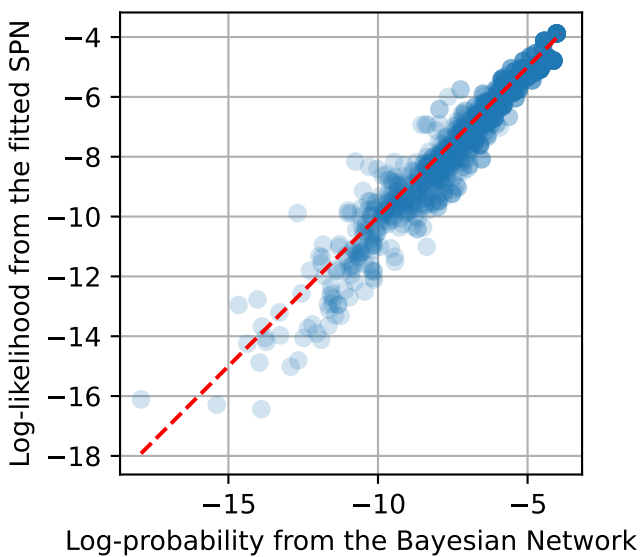

child

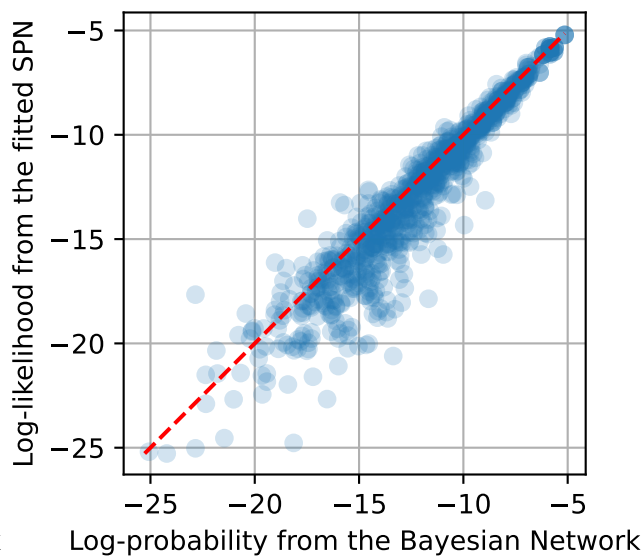

water

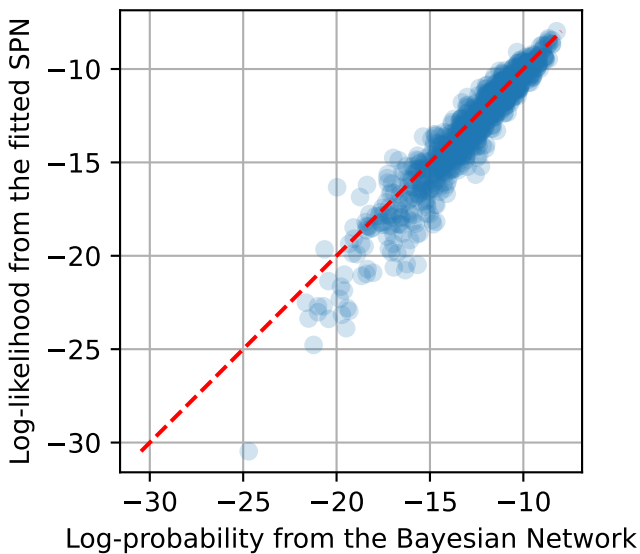

alarm

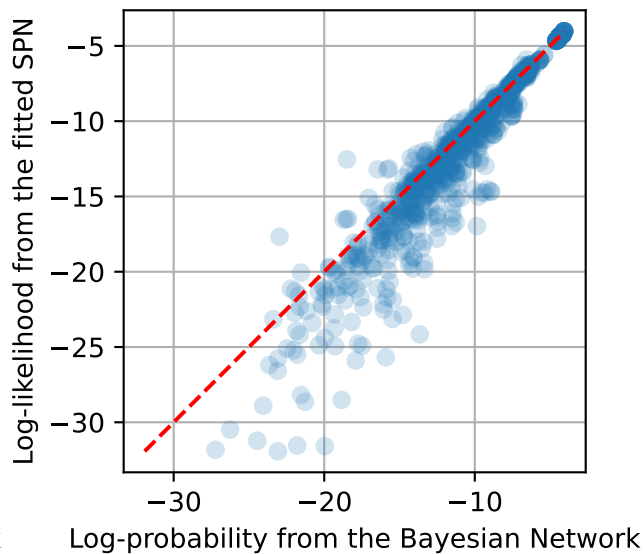

win95pts

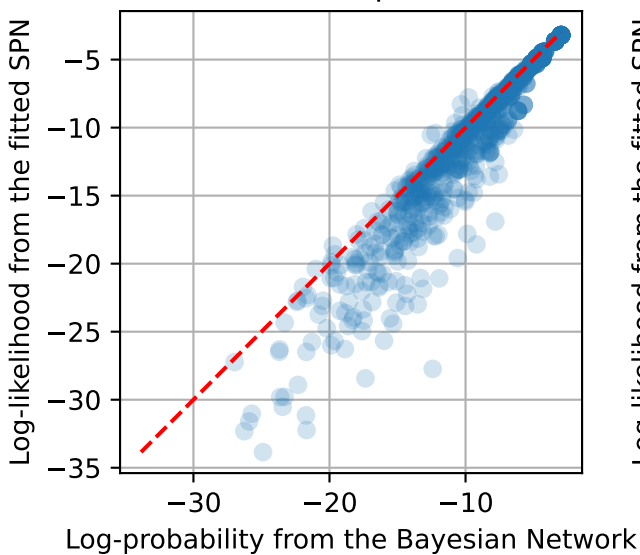

andes

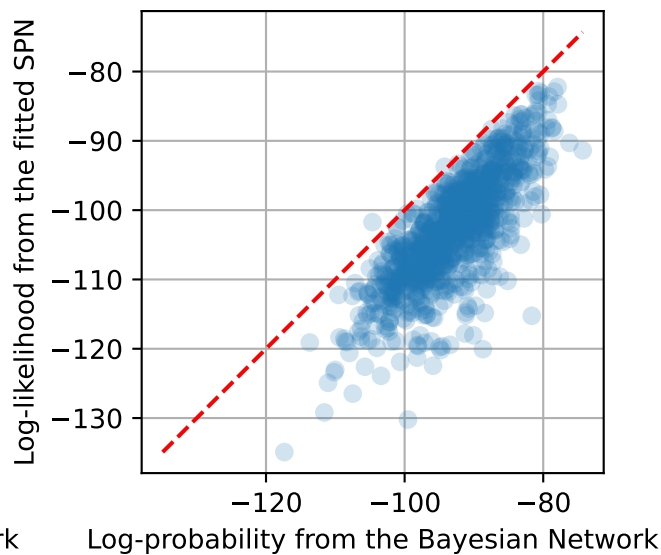

Supplement: supplementary_material [file attachment]

alarm

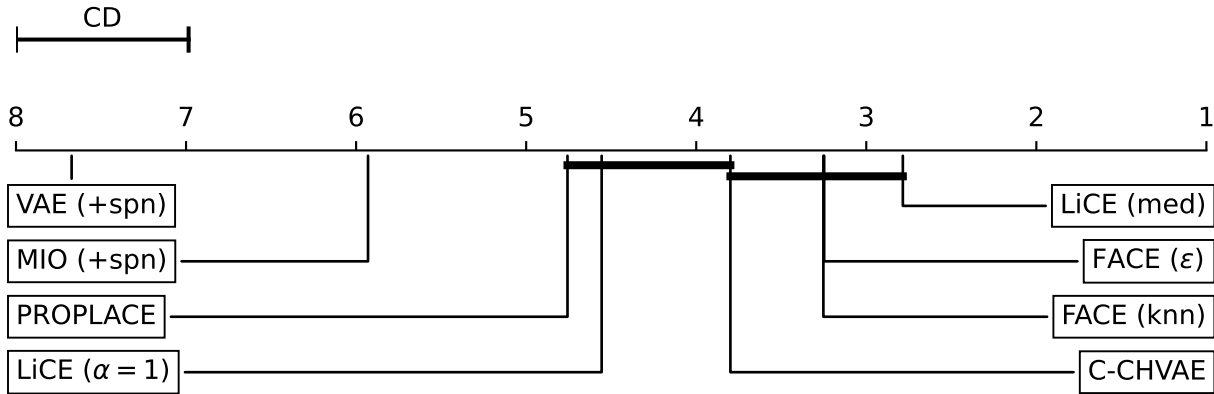

Supplement: supplementary_material [file attachment]
